# Supplementary material
Source: Royal Society of Chemistry journal article supplement (doi:10.1039/d5cp03660g)
Supplement: d5cp03660g1.pdf [file d5cp03660g1.pdf]

## Supporting Information

### **Theoretical insight into the unique dual roles of Li doping in switching magnetic anisotropy and enhancing curie temperature in $\text{CoCl}_3$ monolayers**

Hongbo Wang,<sup>\*a</sup> Lu Zhang,<sup>a</sup> Jinghua Guo<sup>a</sup> and Gang Chen<sup>\*b</sup>

<sup>a</sup>School of Physics and Technology, University of Jinan, Jinan, Shandong 250022,  
China.

<sup>b</sup>School of Physics and Electronics, Shandong Normal University, Jinan, Shandong  
250358, China.

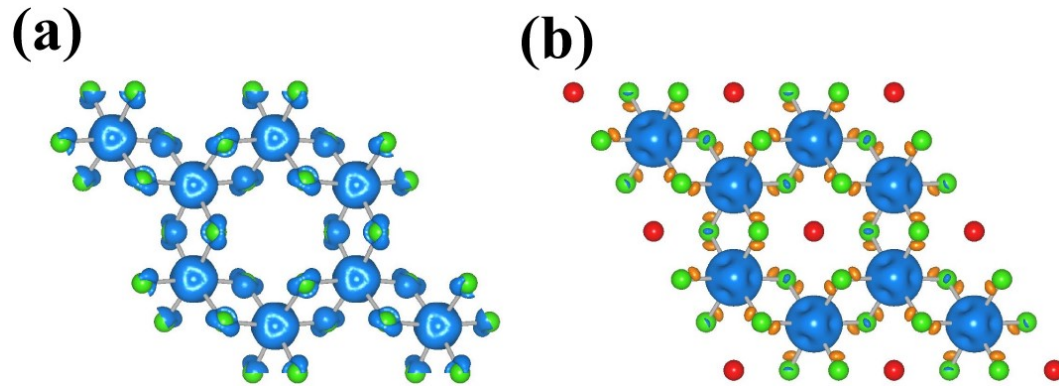

Fig. S1 The illustration of the magnetic distribution at the iso-value of  $0.01 \mu_B/\text{\AA}^3$ . (a) for the pristine  $\text{CoCl}_3$  monolayer and (b) for the  $\text{LiCo}_2\text{Cl}_6$ . The blue isosurfaces correspond to excess of spin-up electrons, and the yellow isosurfaces correspond to excess of spin-down electrons.

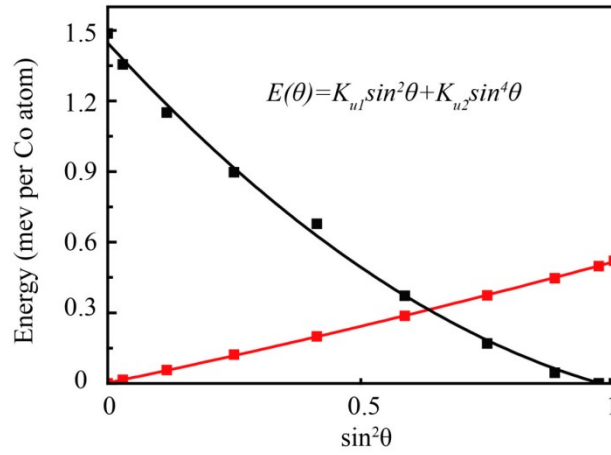

Fig. S2 Relative total energy as a function of  $\sin^2\theta$  for pristine  $\text{CoCl}_3$  and  $\text{LiCo}_2\text{Cl}_6$  monolayers. The black squares and fitting curve represent  $\text{CoCl}_3$ , while the red squares and fitting curve represent  $\text{LiCo}_2\text{Cl}_6$ .

To further verify the magnetic easy-axis direction, we calculated the relative total energy at different magnetization angles. The angle  $\theta$  is defined with respect to the out-of-plane direction. Therefore,  $\sin^2\theta=0$  corresponds to the out-of-plane magnetization direction, while  $\sin^2\theta=1$  corresponds to the in-plane magnetization direction. For each system, the lowest total energy in the angular scan was taken as the reference.

The calculated angular-dependent energies were fitted using  $E(\theta)=K_{u1}\sin^2\theta+K_{u2}\sin^4\theta$ . In this expression, the energy difference between the in-plane and out-of-plane directions can be estimated as  $\text{MAE}=E(90 \text{ degrees})-E(0 \text{ degrees})=K_{u1}+K_{u2}$ . Thus, the sign of  $K_{u1}+K_{u2}$  provides a direct check of the magnetic easy axis: a negative value indicates that the in-plane direction is lower in energy, while a positive value indicates that the out-of-plane direction is lower in energy. For the pristine  $\text{CoCl}_3$  monolayer, the black fitting curve gives  $K_{u1}=-2.35$  and  $K_{u2}=0.89$ . Thus,  $K_{u1}+K_{u2}$  is negative, and the energy minimum occurs at  $\sin^2\theta=1$ , corresponding to  $\theta=90$  degrees. This confirms the in-plane magnetic easy axis. For the  $\text{LiCo}_2\text{Cl}_6$  monolayer, the red fitting curve gives  $K_{u1}=0.48$  and  $K_{u2}=0.07$ . In this case,  $K_{u1}+K_{u2}$  is positive, and the energy minimum appears at  $\sin^2\theta=0$ , corresponding to the out-of-plane direction.

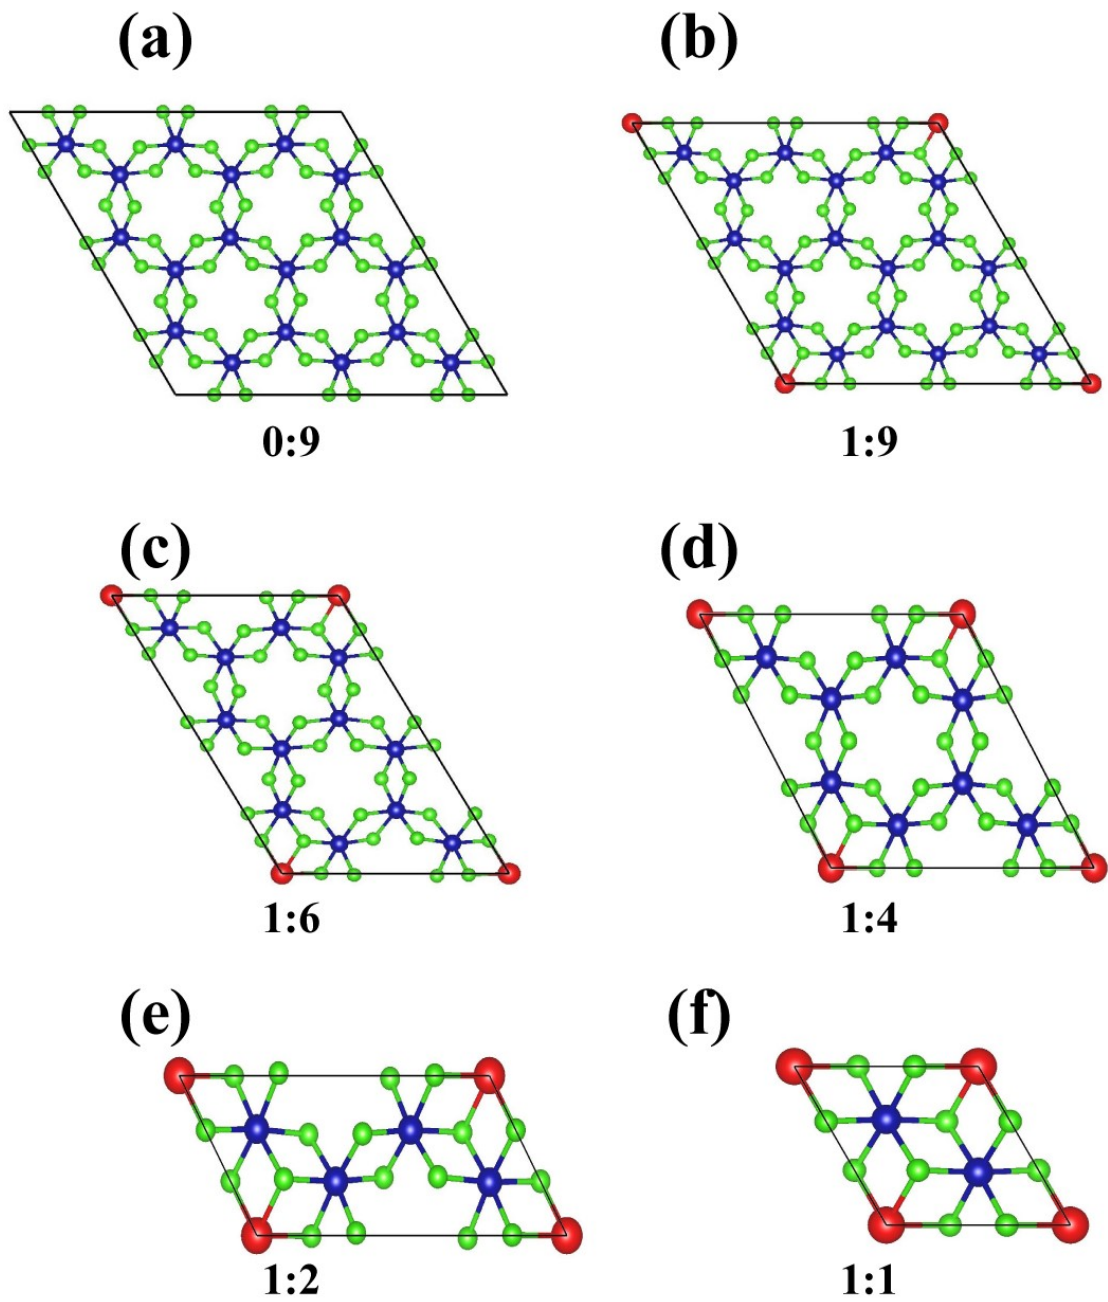

Fig. S3 The configurations of  $\text{CoCl}_3$  monolayer at different Li doping concentration.

The bottom numbers are the ratios between the Li ions and the  $\text{Co}_2\text{Cl}_6$  units.

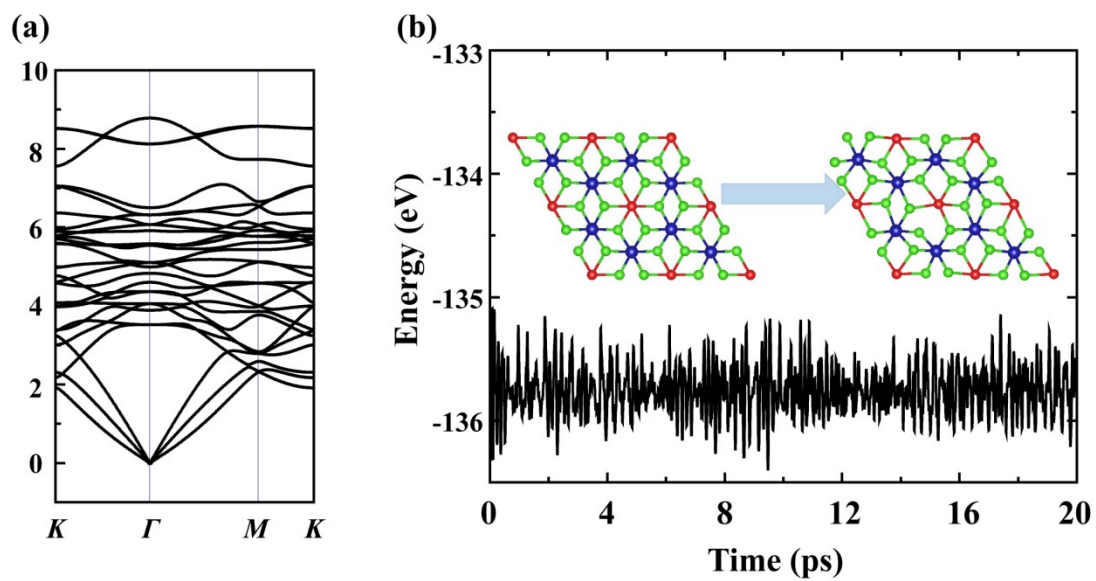

Fig. S4 (a) Phonon spectrum LiCo<sub>2</sub>Cl<sub>6</sub> monolayer. (b) Potential energy versus time of the simulation performed at 300 K of the LiCo<sub>2</sub>Cl<sub>6</sub> monolayer and the corresponding structures obtained at the beginning and the end of the simulation.

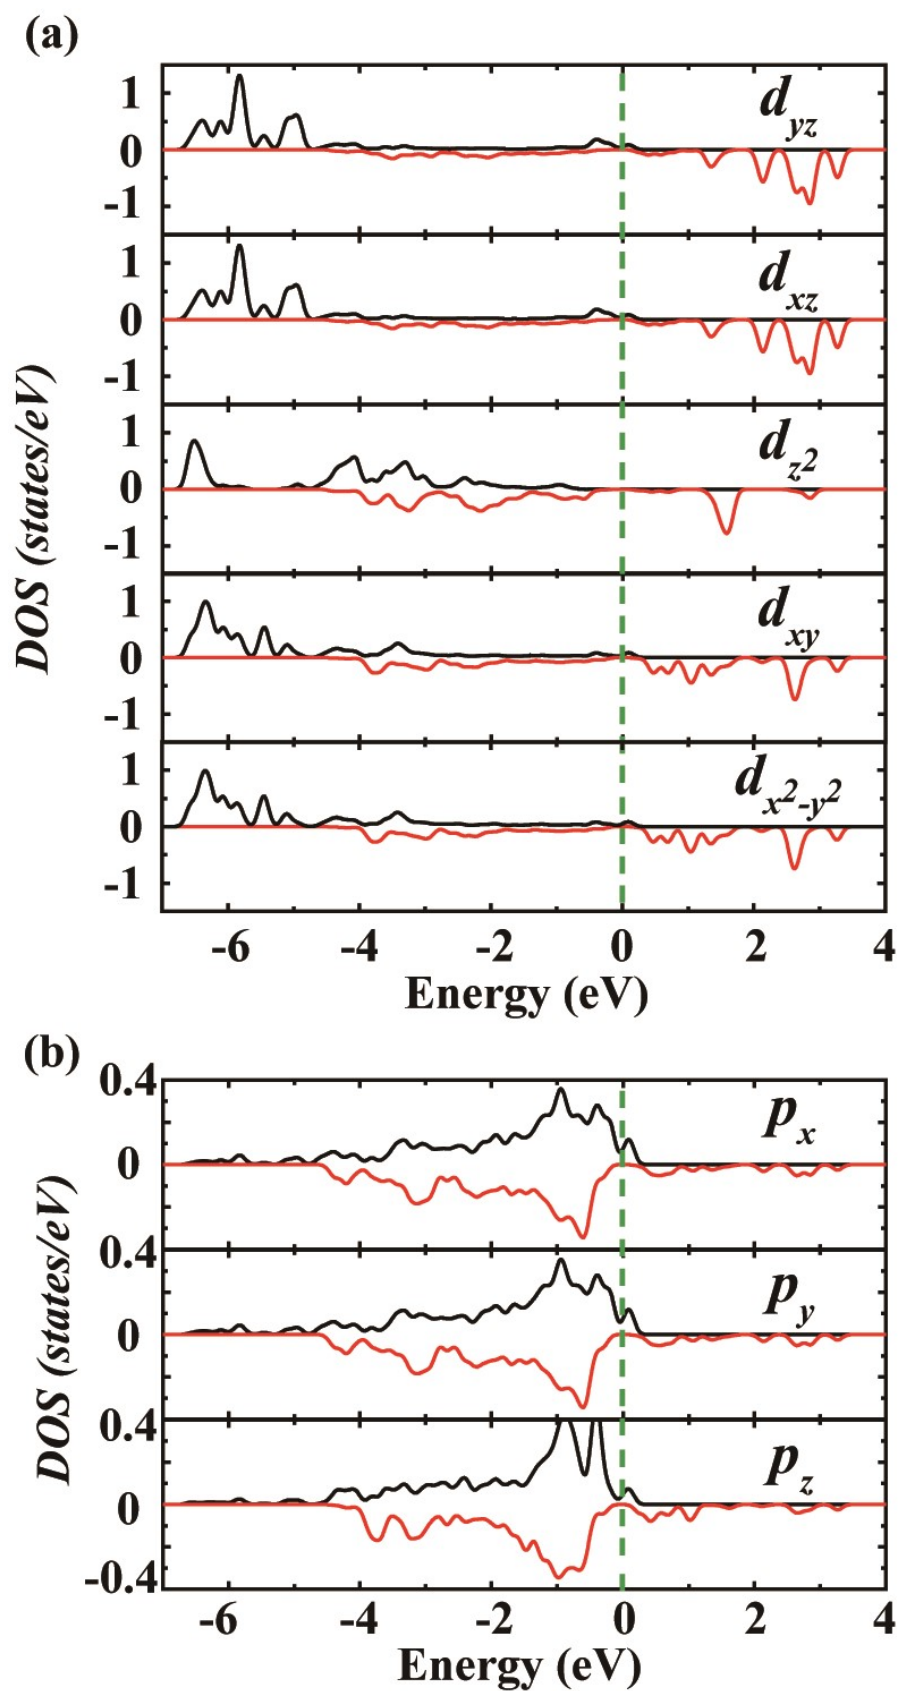

Fig. S5 (a) and (b) Orbitally resolved DOS of Co and Cl atom in  $\text{Li}(\text{Co}_2\text{Cl}_6)_9$  monolayer which is shown in Fig. S3(b), respectively.

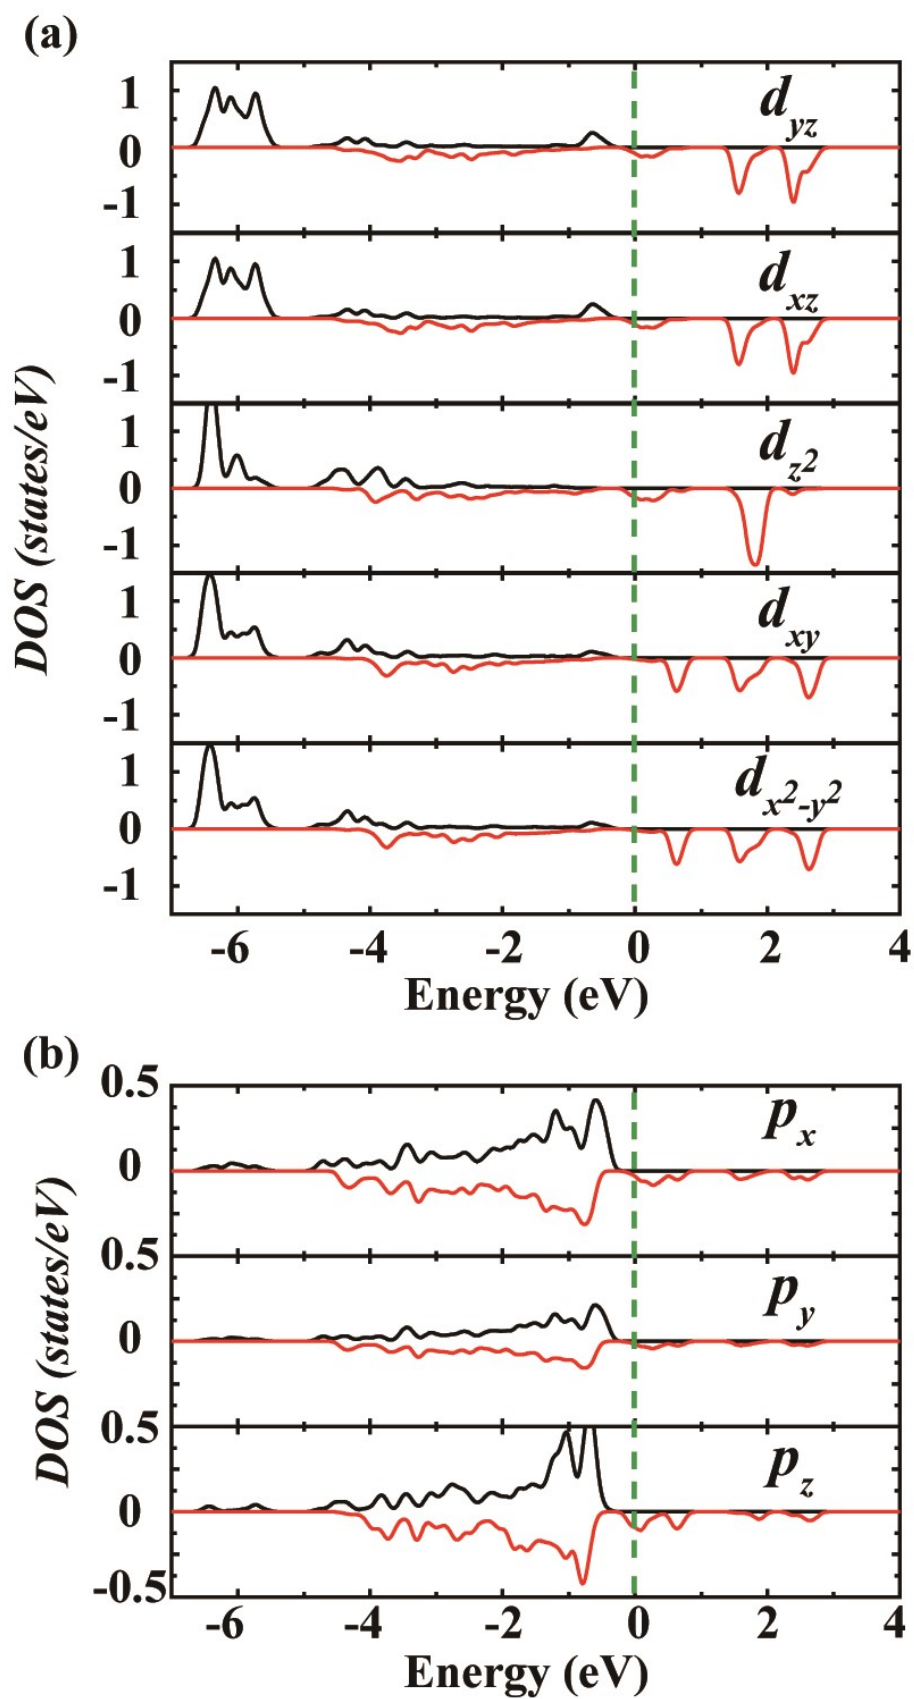

Fig. S6 (a) and (b) Orbitally resolved DOS of Co and Cl atom in  $\text{Li}(\text{Co}_2\text{Cl}_6)_4$  monolayer which is shown in Fig. S3(d), respectively.

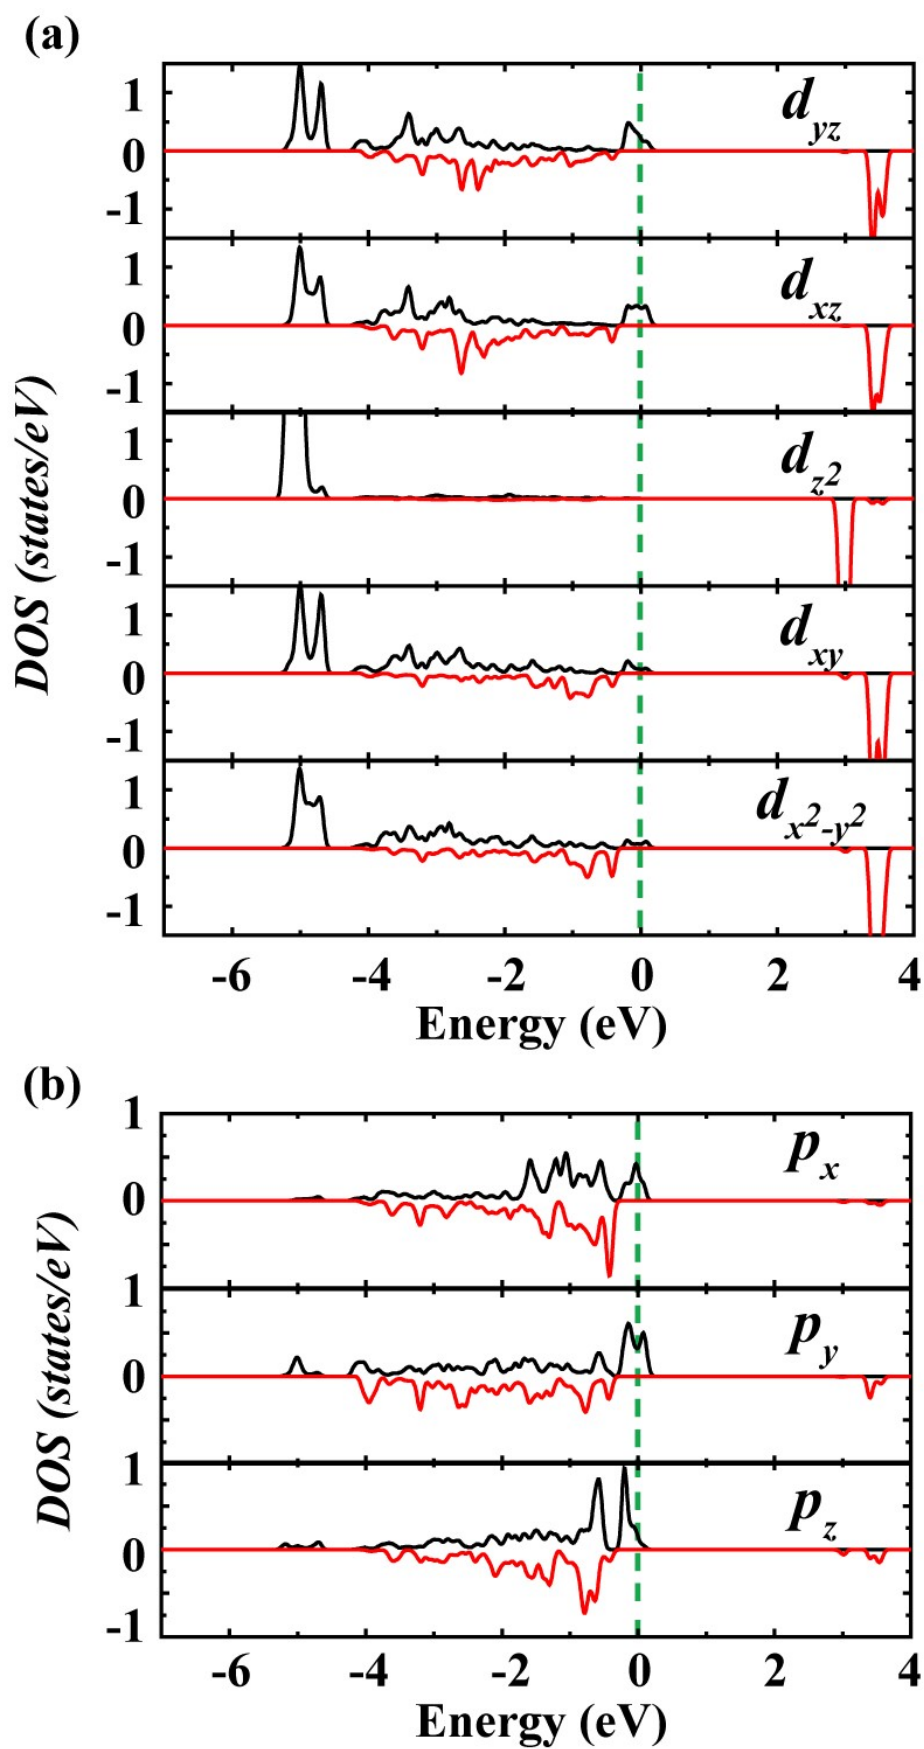

Fig. S7 (a) and (b) Orbitally resolved DOS of Co and Cl atom in LiCo<sub>2</sub>Cl<sub>6</sub> monolayer, respectively.

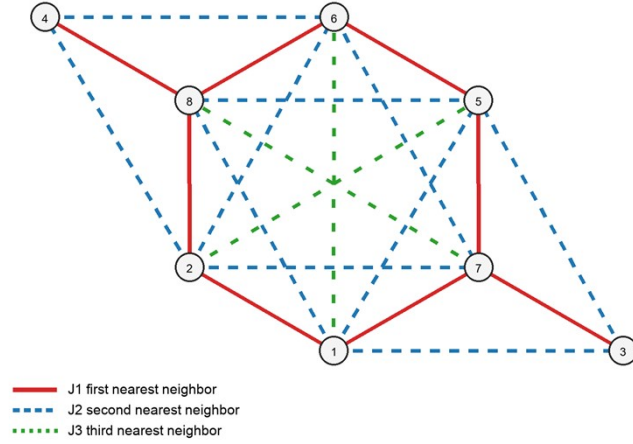

Fig. S8 Schematic illustration of the first-, second-, and third-nearest-neighbor exchange paths in the  $2 \times 2$   $\text{CoCl}_3$  supercell. The red solid, blue dashed, and green dotted lines represent  $J_1$ ,  $J_2$ , and  $J_3$ , respectively.

For the exchange parameters, we provide the detailed energy-mapping procedure used to extract the magnetic exchange interactions. The first-, second-, and third-nearest-neighbor Co-Co exchange paths in a  $2 \times 2$   $\text{CoCl}_3$  supercell are denoted as  $J_1$ ,  $J_2$ , and  $J_3$ , respectively. By fitting the total energies of different magnetic configurations,  $J_1$ ,  $J_2$ , and  $J_3$  can be extracted independently. The obtained values are  $J_1 = 1.14$  meV,  $J_2 = -0.27$  meV, and  $J_3 = -0.26$  meV. Since the magnitudes of  $J_2$  and  $J_3$  are much smaller than that of  $J_1$ , the nearest-neighbor exchange interaction dominates the magnetic coupling.
